# Supplementary material for: High-Sensitivity Cardiac Troponin T and the Diagnosis of Cardiovascular Disease in the Emergency Room: The Importance of Combining Cardiovascular Biomarkers with Clinical Data
Source: MDPI journal article supplement (doi:10.3390/jcm11133798), 2022-06-30
Supplement: s1 [file s1]

**Table S1.** Demographic, clinical features and lab results of the three groups of hospitalized patients.

|                                                            | Acute<br>coronary<br>syndrome (ACS)<br>(N = 182) | Non-ACS<br>cardiovascular<br>disease<br>(N = 337) | Non<br>cardiovascular<br>disease<br>(N = 488) | p<br>value      |
|------------------------------------------------------------|--------------------------------------------------|---------------------------------------------------|-----------------------------------------------|-----------------|
| Male, n (%)                                                | 121 (66%)                                        | 188 (56%)                                         | 267 (55%)                                     | <b>0.02</b>     |
| Age (years, M ± SD)                                        | 69.4 ± 12.7                                      | 76.0 ± 13.0                                       | 77.6 ± 11.9                                   | <b>&lt;0.01</b> |
| <b>Cardiovascular risk factors</b>                         |                                                  |                                                   |                                               |                 |
| Hypertension, n (%)                                        | 122 (71%)                                        | 258 (79%)                                         | 356 (79%)                                     | 0.07            |
| Dyslipidemia, n (%)                                        | 67 (43%)                                         | 142 (49%)                                         | 176 (44%)                                     | 0.34            |
| Active smoking, n (%)                                      | 58 (46%)                                         | 54 (30%)                                          | 57 (22%)                                      | <b>&lt;0.01</b> |
| Familiarity with CCS, n (%)                                | 33 (30%)                                         | 20 (13%)                                          | 6 (3%)                                        | <b>&lt;0.01</b> |
| Diabetes, n (%)                                            | 43 (25%)                                         | 103 (32%)                                         | 116 (25%)                                     | 0.1             |
| <b>Comorbidities</b>                                       |                                                  |                                                   |                                               |                 |
| CCS, n (%)                                                 | 42 (25%)                                         | 114 (36%)                                         | 124 (28%)                                     | <b>0.01</b>     |
| SAT atheromasia, n (%)                                     | 15 (13%)                                         | 49 (25%)                                          | 65 (22%)                                      | <b>0.03</b>     |
| Previous HF, n (%)                                         | 10 (6%)                                          | 81 (28%)                                          | 60 (14%)                                      | <b>&lt;0.01</b> |
| Previous AF, n (%)                                         | 14 (8%)                                          | 104 (36%)                                         | 113 (25%)                                     | <b>&lt;0.01</b> |
| CKD, n (%)                                                 | 19 (11%)                                         | 88 (28%)                                          | 102 (23%)                                     | <b>&lt;0.01</b> |
| COPD, n (%)                                                | 15 (9%)                                          | 57 (18%)                                          | 100 (22%)                                     | <b>&lt;0.01</b> |
| Other comorbidities, n (%)                                 | 89 (56%)                                         | 214 (70%)                                         | 306 (69%)                                     | <b>&lt;0.01</b> |
| <b>Home therapies</b>                                      |                                                  |                                                   |                                               |                 |
| ACE-i, n (%)                                               | 38 (24%)                                         | 89 (29%)                                          | 100 (24%)                                     | 0.20            |
| Sartans, n (%)                                             | 43 (27%)                                         | 125 (42%)                                         | 152 (36%)                                     | <b>&lt;0.01</b> |
| Betablockers, n (%)                                        | 36 (22%)                                         | 95 (32%)                                          | 123 (29%)                                     | 0.10            |
| Calcium channel blockers, n (%)                            | 21 (13%)                                         | 102 (34%)                                         | 153 (37%)                                     | <b>&lt;0.01</b> |
| Loop diuretics, n (%)                                      | 21 (13%)                                         | 101 (34%)                                         | 88 (21%)                                      | <b>&lt;0.01</b> |
| MRAs, n (%)                                                | 10 (6%)                                          | 84 (28%)                                          | 86 (21%)                                      | <b>&lt;0.01</b> |
| NOA/OAT, n (%)                                             | 36 (23%)                                         | 83 (28%)                                          | 103 (25%)                                     | 0.38            |
| ASA/DAPT, n (%)                                            | 27 (15%)                                         | 50 (15%)                                          | 59 (13%)                                      | 0.57            |
| Thiazide diuretics, n (%)                                  | 4 (2%)                                           | 8 (2%)                                            | 16 (3%)                                       | 0.61            |
| Other non-cardiovascular drugs, n (%)                      | 46 (29%)                                         | 111 (37%)                                         | 21 (5%)                                       | <b>&lt;0.01</b> |
| <b>Vital parameters<br/>(median, 25° - 75° percentile)</b> |                                                  |                                                   |                                               |                 |
| SBP, mmHg                                                  | 140.0 (125.0 – 150.0)                            | 130.0 (112.0 – 150.0)                             | 130.0 (113.8 – 150.0)                         | <b>&lt;0.01</b> |
| DBP, mmHg                                                  | 80.0 (72.0 – 90.0)                               | 80.0 (65.0 – 90.0)                                | 75.0 (62.3 – 84.0)                            | <b>&lt;0.01</b> |
| HR, bpm                                                    | 80.0 (66.3 – 90.0)                               | 90.0 (71.5 – 110.0)                               | 80.0 (69.5 – 96.3)                            | <b>&lt;0.01</b> |
| SpO <sub>2</sub> , %                                       | 98.0 (95.0 – 99.0)                               | 97.0 (93.0 – 98.0)                                | 96.0 (93.0 – 98.0)                            | <b>&lt;0.01</b> |
| BT, °C                                                     | 36.0 (36.0 – 36.5)                               | 36.2 (36.0 – 36.9)                                | 36.5 (36.0 – 37.6)                            | <b>&lt;0.01</b> |
| <b>Rhythmic /<br/>arrhythmic heart sounds, n (%)</b>       |                                                  |                                                   |                                               |                 |
| ECG: AF, n (%)                                             | 116 (92%)/10 (8%)                                | 176 (72%)/67 (28%)                                | 283 (86%)/46 (14%)                            | <b>&lt;0.01</b> |
| ECG: AF, n (%)                                             | 16 (12%)                                         | 62 (32%)                                          | 23 (15%)                                      | <b>&lt;0.01</b> |
| <b>Signs and symptoms of<br/>presentation</b>              |                                                  |                                                   |                                               |                 |
| Chest pain, n (%)                                          | 152 (84%)                                        | 107 (32%)                                         | 76 (16%)                                      | <b>&lt;0.01</b> |
| Dyspnea, n (%)                                             | 34 (19%)                                         | 202 (60%)                                         | 193 (40%)                                     | <b>&lt;0.01</b> |
| Epigastralgia, n (%)                                       | 14 (8%)                                          | 18 (5%)                                           | 42 (9%)                                       | 0.19            |
| Presyncope, n (%)                                          | 3 (2%)                                           | 12 (4%)                                           | 22 (5%)                                       | 0.21            |
| Syncope, n (%)                                             | 10 (6%)                                          | 20 (6%)                                           | 74 (15%)                                      | <b>&lt;0.01</b> |
| Peripheral edema, n (%)                                    | 9 (5%)                                           | 61 (18%)                                          | 49 (10%)                                      | <b>&lt;0.01</b> |

|                                            |                           |                           |                           |       |
|--------------------------------------------|---------------------------|---------------------------|---------------------------|-------|
| Palpitations, n (%)                        | 8 (4%)                    | 35 (10%)                  | 10 (2%)                   | <0.01 |
| Other non-cardiovascular symptoms, n (%)   | 52 (29%)                  | 109 (33%)                 | 251 (52%)                 | <0.01 |
| <b>Laboratory tests</b>                    |                           |                           |                           |       |
| <b>(median, 25° - 75° percentile)</b>      |                           |                           |                           |       |
| <b>CBC</b>                                 |                           |                           |                           |       |
| White blood cells, 106/L                   | 9440.0 (7055.0 – 12127.5) | 9270.0 (7160.0 – 12570.0) | 9590.0 (7395.0 – 12937.5) | 0.46  |
| Hematocrit, %                              | 40.6 (36.5 – 44.2)        | 38.8 (34.8 – 42.5)        | 37.2 (33.1 – 41.1)        | <0.01 |
| Hb, g/dL                                   | 13.6 (12.3 – 15.3)        | 12.9 (11.4 – 14.4)        | 12.4 (11.0 – 13.8)        | <0.01 |
| Platelets count, 10 <sup>9</sup> /L        | 228.0 (191.0 – 292.0)     | 215.0 (175.0 – 264.0)     | 222.0 (170.0 – 288.0)     | 0.09  |
| <b>CRP, mg/L</b>                           | 4.0 (1.2 – 10.7)          | 8.8 (2.9 – 31.9)          | 17.6 (3.9 – 67.1)         | <0.01 |
| <b>INR</b>                                 | 0.99 (0.94 – 1.06)        | 1.1 (0.9 – 1.3)           | 1.1 (1.0 – 1.2)           | <0.01 |
| <b>Renal function</b>                      |                           |                           |                           |       |
| eGFR (CKD-EPI), mL/min/1.73 m <sup>2</sup> | 71.0 (53.0 – 86.0)        | 53.0 (32.8 – 70.0)        | 54.0 (36.0 – 73.0)        | <0.01 |
| Creatinine, mg/dL                          | 1.1 (0.9 – 1.3)           | 1.3 (1.0 – 1.8)           | 1.2 (0.94 – 1.7)          | <0.01 |
| Urea, mg/dL                                | 44.0 (34.0 – 53.0)        | 55.0 (41.0 – 84.0)        | 53.0 (40.0 – 77.0)        | <0.01 |
| <b>Liver function</b>                      |                           |                           |                           |       |
| AST, U/L                                   | 29.0 (22.0 – 38.0)        | 26.0 (21.0 – 37.0)        | 26.0 (21.0 – 40.0)        | 0.18  |
| ALT, U/L                                   | 22.0 (16.0 – 33.8)        | 23.0 (16.0 – 34.0)        | 21.0 (15.0 – 35.0)        | 0.54  |
| <b>CPK, U/L</b>                            | 126.0 (91.0 – 193.0)      | 87.0 (55.0 – 138.3)       | 85.0 (51.0 – 156.0)       | <0.01 |
| <b>NT-proBNP, ng/L</b>                     | 850.0 (226.0 – 4238.5)    | 3893.0 (1747.0 – 9993.5)  | 1498.0 (537.0 – 4164.0)   | <0.01 |

Legend. N= number; M= mean; SD= standard deviation; CCS= chronic coronary syndromes; SAT= supra-aortic trunk; CKD= chronic kidney disease; COPD= chronic obstructive pulmonary disease; HF= heart failure; AF= atrial fibrillation; ACE-i= inhibitors of the angiotensin I converting enzyme; MRAs= mineralocorticoid receptor antagonists; NOA/OAT= new oral anticoagulants/oral anticoagulant therapy; ASA/DAPT= acetylsalicylic acid/double antiplatelet therapy; SBP= systolic blood pressure; DBP= diastolic blood pressure; HR= heart rate; SpO<sub>2</sub>= peripheral oxygen saturation; BT= body temperature; AF= atrial fibrillation; CBC= complete blood count; Hb= hemoglobin; CRP= C-reactive protein; INR= international normalized ratio; eGFR= estimated glomerular filtration rate; CKD-EPI= Chronic Kidney Disease Epidemiology Collaboration; AST= aspartate transaminase; ALT= alanine transaminase; CPK= creatinephosphokinase; NT-proBNP= N-terminal pro-B-type natriuretic peptide.

**Table S2. Univariate Analysis - Cardiovascular versus non-cardiovascular disease.**

|                          | <b>Odds ratio</b> | <b>95% CI</b> | <b>p value</b> |
|--------------------------|-------------------|---------------|----------------|
| Male sex                 | 1.22              | 0.95 - 1.56   | 0.12           |
| Age                      | 0.98              | 0.97 - 0.99   | <0.01          |
| Active smoking           | 2.05              | 1.41 - 2.98   | <0.01          |
| Familiarity with CCS     | 9.29              | 3.91 - 22.05  | <0.01          |
| CCS                      | 1.23              | 0.93 - 1.63   | 0.15           |
| SAT atheromasia          | 0.87              | 0.59 – 1.28   | 0.48           |
| Previous AF              | 0.97              | 0.72 – 1.31   | 0.84           |
| Previous HF              | 1.57              | 1.10 – 2.24   | <b>0.01</b>    |
| CKD                      | 0.94              | 0.69 – 1.28   | 0.71           |
| COPD                     | 0.61              | 0.44 – 0.86   | <0.01          |
| Sartans                  | 1.00              | 0.76 – 1.33   | 0.96           |
| Calcium channel blockers | 0.64              | 0.48 - 0.85   | <0.01          |
| Loop diuretics           | 1.37              | 1.00 - 1.87   | 0.05           |
| MRA                      | 0.99              | 0.71 - 1.37   | 0.93           |
| SBP                      | 1.00              | 0.99 - 1.00   | 0.30           |
| DBP                      | 1.02              | 1.00 – 1.03   | <0.01          |
| HR                       | 1.00              | 0.99 – 1.02   | 0.06           |
| SpO <sub>2</sub>         | 1.04              | 1.00 - 1.08   | <b>0.03</b>    |
| BT                       | 0.998             | 0.997 – 0.999 | <0.01          |
| Arrhythmic heart sounds  | 1.62              | 1.09 – 2.42   | <b>0.02</b>    |

|                                         |        |                 |                 |
|-----------------------------------------|--------|-----------------|-----------------|
| EKG: AF                                 | 1.75   | 1.05 – 2.92     | <b>0.03</b>     |
| Chest pain                              | 5.38   | 3.98 – 7.25     | <b>&lt;0.01</b> |
| Dyspnea                                 | 1.26   | 0.98 – 1.62     | 0.07            |
| Syncope                                 | 0.34   | 0.22 - 0.53     | <b>&lt;0.01</b> |
| Peripheral edema                        | 1.39   | 0.95 – 2.05     | 0.09            |
| Heart-pounding                          | 4.29   | 2.13 – 8.64     | <b>&lt;0.01</b> |
| WBC                                     | 1.00   | 1.00 - 1.00     | 0.07            |
| Hb                                      | 1.004  | 1.0009 – 1.007  | <b>&lt;0.01</b> |
| Ht                                      | 1.0009 | 1.0000 -1.002   | <b>0.02</b>     |
| CRP                                     | 0.9993 | 0.9990 - 0.9996 | <b>&lt;0.01</b> |
| INR                                     | 0.9988 | 0.9971 – 1.0005 | 0.16            |
| eGFR (CKD-EPI)                          | 1.005  | 0.9998 – 1.01   | 0.06            |
| Creatinine                              | 0.9996 | 0.9986 – 1.0006 | 0.42            |
| Urea                                    | 0.999  | 0.996 -1.002    | 0.40            |
| CPK                                     | 0.9999 | 0.9997 - 1.0002 | 0.63            |
| NT-proBNP                               | 1.00   | 1.00 - 1.00     | <b>0.04</b>     |
| <b>First hs-cTnT</b>                    | 1.003  | 1.002 - 1.004   | <b>&lt;0.01</b> |
| <b>Significant variation of hs-cTnT</b> | 2.62   | 1.72 – 3.99     | <b>&lt;0.01</b> |
| <b>Mean % of variation of hs-cTnT</b>   | 1.006  | 1.003 – 1.009   | <b>&lt;0.01</b> |

Legend. CI = confidence interval; CCS = chronic coronary syndrome; SAT= supra-aortic trunk; AF= atrial fibrillation; HF = heart failure; CKD = chronic kidney disease; COPD = chronic obstructive pulmonary disease; MRA = mineralocorticoid antagonists; SBP = systolic blood pressure; DBP = diastolic blood pressure; HR= heart rate; SpO<sub>2</sub> = peripheral oxygen saturation; BT= body temperature; WBC = white blood cell; Hb = hemoglobin; Ht= hematocrit; CRP = C-reactive protein; eGFR= estimated glomerular filtration rate; CKD-EPI= Chronic Kidney Disease Epidemiology Collaboration; CPK= creatinephosphokinase; NT-proBNP = N-terminal fragment of the brain natriuretic propeptide; hs-cTnT = high-sensitivity cardiac troponin T.

**Table S3.** Univariate Analysis - Acute coronary syndrome (ACS) vs. Non-ACS cardiovascular disease.

|                          | <b>Odds ratio</b> | <b>95% CI</b>   | <b>p value</b>  |
|--------------------------|-------------------|-----------------|-----------------|
| Male sex                 | 0.65              | 0.45 - 0.95     | <b>0.02</b>     |
| Age                      | 0.96              | 0.95 - 0.98     | <b>&lt;0.01</b> |
| Active smoking           | 2.04              | 1.27 - 3.29     | <b>&lt;0.01</b> |
| Familiarity with CCS     | 3.00              | 1.61 - 5.58     | <b>&lt;0.01</b> |
| CCS                      | 0.60              | 0.40 - 0.91     | <b>0.01</b>     |
| SAT atheromasia          | 0.48              | 0.26 - 0.89     | <b>0.02</b>     |
| Previous AF              | 0.19              | 0.10 - 0.34     | <b>&lt;0.01</b> |
| Previous HF              | 0.17              | 0.09 - 0.34     | <b>&lt;0.01</b> |
| CKD                      | 0.35              | 0.20 - 0.59     | <b>&lt;0.01</b> |
| COPD                     | 0.49              | 0.27 - 0.88     | <b>0.01</b>     |
| Sartans                  | 0.53              | 0.35 - 0.80     | <b>&lt;0.01</b> |
| Calcium channel blockers | 0.31              | 0.19 - 0.52     | <b>&lt;0.01</b> |
| Loop diuretics           | 0.29              | 0.17 - 0.49     | <b>&lt;0.01</b> |
| MRA                      | 0.20              | 0.10 - 0.38     | <b>&lt;0.01</b> |
| SBP                      | 1.009             | 1.001 - 1.017   | <b>0.02</b>     |
| DBP                      | 1.018             | 1.005 - 1.032   | <b>&lt;0.01</b> |
| HR                       | 0.98              | 0.97 - 0.99     | <b>&lt;0.01</b> |
| SpO <sub>2</sub>         | 1.07              | 0.99 - 1.15     | <b>0.03</b>     |
| BT                       | 0.9985            | 0.9966 - 1.0004 | 0.13            |
| Arrhythmic heart sounds  | 0.22              | 0.11 - 0.45     | <b>&lt;0.01</b> |
| EKG: AF                  | 0.28              | 0.16 - 0.52     | <b>&lt;0.01</b> |
| Chest pain               | 0.09              | 0.06 - 0.14     | <b>&lt;0.01</b> |
| Dyspnea                  | 0.16              | 0.10 - 0.24     | <b>&lt;0.01</b> |
| Syncope                  | 0.92              | 0.42 - 2.00     | 0.82            |

|                                         |        |                  |             |
|-----------------------------------------|--------|------------------|-------------|
| Peripheral edema                        | 0.23   | 0.11 - 0.48      | <0.01       |
| Heart-pounding                          | 0.39   | 0.18 - 0.87      | <b>0.01</b> |
| WBC                                     | 1.0000 | 1.0000 - 1.0000  | 0.63        |
| Hb                                      | 1.0039 | 1.0002 - 1.0076  | <b>0.01</b> |
| Ht                                      | 1.0001 | 0.9991 - 1.0011  | 0.85        |
| CRP                                     | 0.9996 | 0.9991 - 1.0001  | 0.10        |
| INR                                     | 0.994  | 0.991 - 0.998    | <0.01       |
| eGFR                                    | 1.029  | 1.021 - 1.038    | <0.01       |
| Creatinine                              | 0.995  | 0.992 - 0.998    | <0.01       |
| Urea                                    | 0.986  | 0.980 - 0.992    | <0.01       |
| CPK                                     | 1.0001 | 0.9997 - 1.0005  | 0.60        |
| NT-proBNP                               | 0.9999 | 0.9998 - 1.0000  | <0.01       |
| <b>First hs-cTnT</b>                    | 1.003  | 1.002 - 1.004    | <0.01       |
| <b>Significant variation of hs-cTnT</b> | 4.25   | 2.49 - 7.27      | <0.01       |
| <b>Mean % of variation of hs-cTnT</b>   | 1.0015 | 1.0005 to 1.0025 | <0.01       |

Legend. CI = confidence interval; CCS = chronic coronary syndrome; SAT= supra-aortic trunk; AF= atrial fibrillation; HF = heart failure; CKD = chronic kidney disease; COPD = chronic obstructive pulmonary disease; MRA = mineralocorticoid antagonists; SBP = systolic blood pressure; DBP = diastolic blood pressure; HR= heart rate; SpO<sub>2</sub> = peripheral oxygen saturation; BT= body temperature; WBC = white blood cell; Hb = hemoglobin; Ht= hematocrit; CRP = C-reactive protein; eGFR= estimated glomerular filtration rate; CPK= creatinephosphokinase; NT-proBNP = N-terminal fragment of the brain natriuretic propeptide; hs-cTnT = high-sensitivity cardiac troponin T.

**Figure S1.** ROC curves of the four multivariable models – Cardiovascular vs. NON cardiovascular disease.

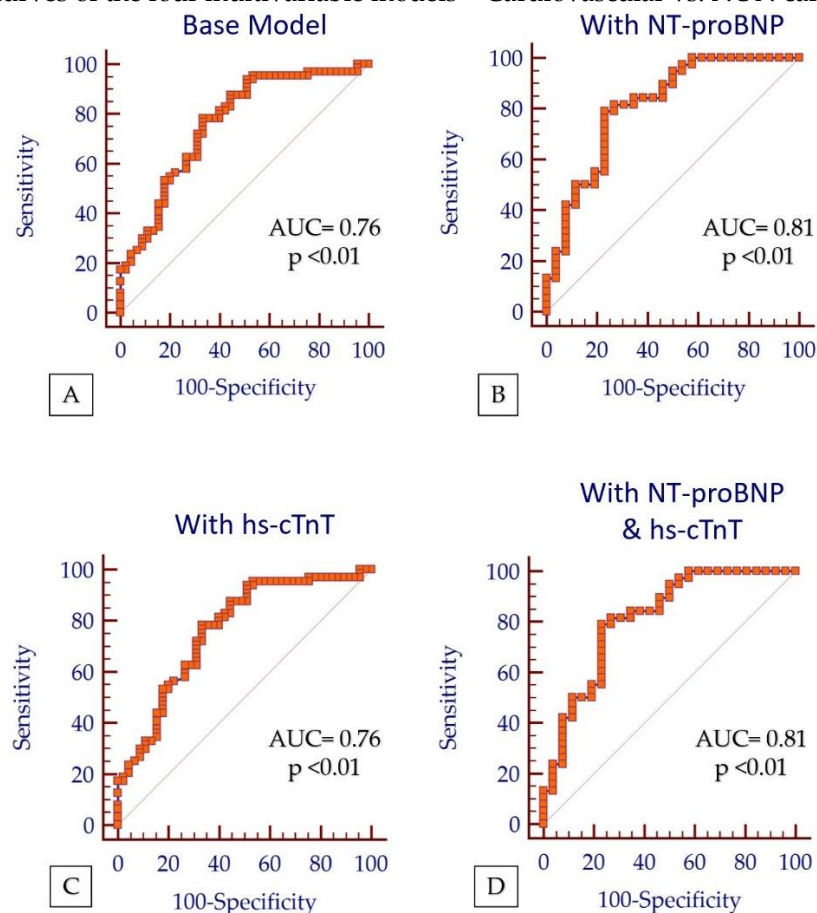

Legend. ROC= Receiver Operating Characteristic; AUC= area under the curve ROC; NT-proBNP = N-terminal fragment of the brain natriuretic propeptide; hs-cTnT = high-sensitivity cardiac troponin T. A= "Base model" = multivariable model without NT-proBNP and hs-cTnT; B= multivariable model with NT-proBNP added to the "base model"; C= multivariable model with hs-cTnT added to the "base model"; D= multivariable model with NT-proBNP and hs-cTnT added to the "base model".

**Figure S2.** ROC curves of the four multivariable models – ACS versus Non-ACS cardiovascular disease.

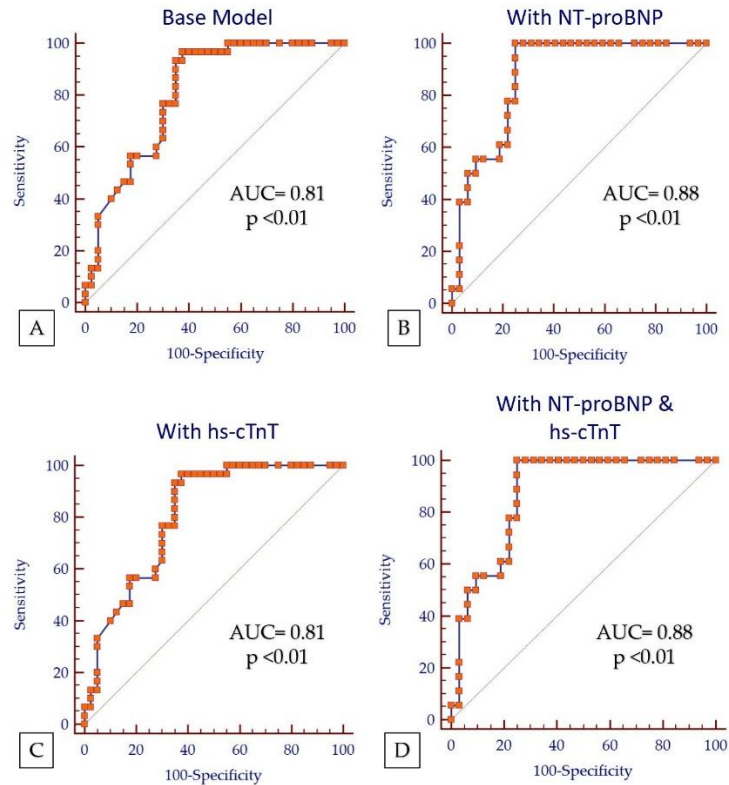

Legend. ROC= Receiver Operating Characteristic; AUC= area under the curve ROC; NT-proBNP = N-terminal fragment of the brain natriuretic propeptide; hs-cTnT = high-sensitivity cardiac troponin T. A= "Base model" = multivariable model without NT-proBNP and hs-cTnT; B= multivariable model with NT-proBNP added to the "base model"; C= multivariable model with hs-cTnT added to the "base model"; D= multivariable model with NT-proBNP and hs-cTnT added to the "base model".
